1 **Title: Pseudogene-mediated DNA demethylation leads to oncogene activation**

2 **Authors:** Junsu Kwon<sup>1</sup>, Yanjing V. Liu<sup>o1</sup>, Chong Gao<sup>o2</sup>, Mahmoud A. Bassal<sup>1,3</sup>, Adrianna I.  
3 Jones<sup>3</sup>, Junyu Yang<sup>2</sup>, Zhiyuan Chen<sup>2</sup>, Li Ying<sup>1</sup>, Henry Yang<sup>1</sup>, Leilei Chen<sup>1</sup>,  
4 Annalisa Di Ruscio<sup>4,5</sup>, Yvonne Tay<sup>\*1,6</sup>, Li Chai<sup>\*2</sup>, Daniel G. Tenen<sup>\*1,3,4</sup>

5  
6 **Affiliations**

7 <sup>1</sup>Cancer Science Institute of Singapore, National University of Singapore, 117599, Singapore

8 <sup>2</sup>Department of Pathology, Brigham and Women's Hospital, Boston, MA 02115, USA

9 <sup>3</sup>Harvard Stem Cell Institute, Harvard Medical School, Boston, MA 02115 USA

10 <sup>4</sup>Harvard Medical School Initiative for RNA Medicine, Harvard Medical School, Boston, MA  
11 02115, USA

12 <sup>5</sup>Department of Translational Medicine, University of Eastern Piedmont, Novara, 28100, Italy

13 <sup>6</sup>Department of Biochemistry, Yong Loo Lin School of Medicine, National University of  
14 Singapore, 117599, Singapore

15 <sup>o</sup>These authors contributed equally to this work as co-second authors

16 <sup>\*</sup>Co-correspondence

17

18 **Running title:** Hepatitis B virus induces pseudogene to activate SALL4

19

20 **Keywords:** SALL4, hepatocellular carcinoma, hepatitis B infection, pseudogene-mediated  
21 oncogene reactivation, DNA demethylation

22

23 **Co-corresponding authors:** Yvonne Tay, National University of Singapore, 14 Medical

24 Drive, Singapore, 117599. Phone: +65 6516-1160, E-mail: yvonnetay@nus.edu.sg; Li Chai,

25 Brigham and Women's Hospital, 77 Avenue Louis Pasteur, NRB630D. Phone: +1 617-840-  
26 6711; Fax: 617-277-9013; E-mail: lchai@bwh.harvard.edu; Daniel G. Tenen, National  
27 University of Singapore, 14 Medical Drive, Singapore, 117599. Phone: +65 6516-1160; E-  
28 mail: daniel.tenen@nus.edu.sg.

29

30 **Declaration of interests:** The authors declare no competing interests.

31

32 This study was supported by Singapore Ministry of Health's National Medical Research  
33 Council; National Institutes of Health; Xiu Research Fund, National Research Foundation  
34 Fellowship; National University of Singapore President's Assistant Professorship; Singapore  
35 Ministry of Education under its Research Centres of Excellence initiative; Singapore  
36 Ministry of Education's AcRF Tier 3 grants; National Cancer Institute; Italian Association for  
37 Cancer Research (AIRC).

38

39 **Word count: 3236 words for the abstract, statement of significance, introduction,**  
40 **results, and discussion**

41

42 **Total number of figures: 4**

43

44 **Total number of supplementary figures/tables: 4/5**

45

46

47 **Abstract**

48 Despite being one of the leading causes of cancer-related deaths, there is an unmet clinical  
49 need for hepatocellular carcinoma (HCC) patients. The lack of effective treatment is, at least  
50 in part, due to our lack of understanding of the molecular pathogenesis of this disease.  
51 Oncofetal protein SALL4 is re-activated in patients with aggressive HCC along with other  
52 solid tumors and hematologic malignancies. This study identifies a previously unrecognized  
53 mechanism of SALL4 reactivation which is mediated by pseudogene-induced demethylation.  
54 Using a locus-specific demethylating technology, we identified the critical CpG region for  
55 SALL4 expression. We showed that SALL4 pseudogene 5 hypomethylates this region  
56 through interaction with DNMT1, resulting in SALL4 upregulation. Intriguingly,  
57 pseudogene 5 is significantly upregulated in a hepatitis B virus (HBV) model prior to SALL4  
58 induction, and both are increased in HBV-HCC patients. Our results suggest that pseudogene-  
59 mediated demethylation represents a unique mechanism of oncogene activation in cancer.

60

61 **Significance**

62 Our study provides a mechanistic link between HBV infection, activation of the oncogene  
63 SALL4, and HCC. We reveal a previously undescribed capability of a pseudogene to  
64 epigenetically activate an oncogene by demethylation in a locus-specific manner.

65

## 66 **Introduction**

67 Hepatocellular carcinoma (HCC) is one of leading causes of cancer-related deaths  
68 globally, with more than 700,000 new cases and 600,000 estimated HCC deaths each year.  
69 Hepatitis B virus infection is one of the main causes of HCC, particularly in Asia. While  
70 surgery, liver transplantation, or radiological intervention may be a viable option for early  
71 stage disease, prognosis for advanced stage HCC remains bleak, with most patients  
72 eventually dying within 20 months after diagnosis. Sorafenib, an oral multikinase inhibitor, is  
73 the one of the few approved agents for patients with advanced HCC (1,2). However, the  
74 effectiveness of Sorafenib for advanced HCC is debatable (2). There is an unmet clinical  
75 need for the development of more effective therapies for the treatment of HCC. The lack of  
76 effective treatment options for HCC is at least in part due to our lack of understanding the  
77 pathogenesis of this disease. Identifying novel pathway(s) that are responsible for HCC could  
78 be translated into targeted therapy and improve the outcomes of these patients.

79 SALL4 is a potent stem cell factor for self-renewal and pluripotency of embryonic stem  
80 cells (ESCs) (3,4). During development, SALL4 expression diminishes gradually and is  
81 eventually silenced in most normal tissues. Strikingly, high SALL4 expression levels have  
82 been observed in many malignancies such as liver cancer, acute myeloid leukemia, breast  
83 cancer and lung cancer (5-8). Re-expression of SALL4 in cancers is associated with a more  
84 aggressive cancer phenotype, drug resistance and reduced patient survival (5,6,9-11). Of note,  
85 HCC patients with detectable SALL4 expression have enriched hepatic progenitor-like gene  
86 signatures and poorer prognoses (10). Furthermore, targeting SALL4 in HCC cell lines by  
87 knocking down or using inhibitory peptides resulted in cellular death (12), suggesting that  
88 SALL4 plays a crucial role in hepatocarcinogenesis and that targeting SALL4 may provide  
89 an innovative therapeutic approach for this disease. However, mechanistically, how SALL4 is  
90 re-activated in HCC is still unclear, although it has been reported that aberrant methylation

91 could be a contributing factor (13,14). By defining the mechanism of SALL4 reactivation in  
92 HCC, we can better treat HCC.

93 DNA methylation is a frequently studied mechanism of epigenetic regulation in humans  
94 that is mediated by DNA methyltransferases (DNMT); of which, DNMT1 has a structural  
95 binding preference (15). Research by multiple groups including ours has demonstrated that  
96 non-coding RNAs (ncRNAs) such as ecCEBP $\alpha$ , Dali, Dum, and Dacor1 can interact with  
97 DNMT1 to inhibit its methylation activity. These ncRNAs thus indirectly alter local  
98 methylation states in different cancers, acting as key tissue-specific epigenetic regulators of  
99 gene expression (15-18). It was also reported that the exon 1-intron 1 region of the  
100 *SALL4* gene locus is hypermethylated in non *SALL4*-expressing K562 leukemic cells.  
101 Reprogramming of these cells resulted in demethylation of this region and a subsequent  
102 increase in *SALL4* expression (14). Recently, a report described demethylation of specific  
103 CpG sites downstream of the *SALL4* transcriptional start site (TSS) in hepatitis B (HBV)-  
104 related HCC which could contribute to *SALL4* re-activation in HCC (13). However, it is still  
105 unclear how HBV infection could initiate the demethylation and reactivation of specific  
106 oncogenes.

107 Pseudogenes are a class of non-coding RNAs (ncRNAs) once regarded as insignificant  
108 “junk” DNA relics due to their lack of coding potential. However, studies have demonstrated  
109 that pseudogene transcripts can regulate gene expression of oncogenes and tumor-suppressors  
110 by acting as antisense transcripts, processed small interfering RNAs (siRNAs) and competing  
111 endogenous RNAs (ceRNAs) (19-21). Recent pseudogene expression analysis in over 2,800  
112 patient samples showed strong concordance between pseudogene expression and tumor  
113 subtypes, as well as patient prognoses, highlighting the clinical importance of pseudogenes  
114 (22). Our group focused on characterizing regulatory functions of *SALL4* pseudogenes.  
115 *SALL4*, a well-studied oncogene with high expression levels in several hematological

116 malignancies and solid tumors, has eight pseudogenes of different lengths varying from 500  
117 nucleotides to 6,000 nucleotides, and yet there have been no studies investigating SALL4  
118 pseudogenes (5-8).

119 As many pseudogenes are actively transcribed in cells, we postulated that they could  
120 interact with RNA-binding proteins such as DNMT1 via highly homologous RNA motifs and  
121 exert regulatory functions. We therefore tested the hypothesis as to whether pseudogenes are  
122 involved in DNA methylation as DNMT1-interacting lncRNAs in an HBV-positive HCC  
123 model.

124

## 125 **Results**

### 126 **SALL4 expression is negatively correlated with methylation of the**

#### 127 **5' UTR - exon 1 - intron 1 region**

128 We hypothesized that the degree of methylation in the SALL4 locus is associated with  
129 SALL4 expression, therefore, we examined HBV-positive HCC patients. Using a publicly  
130 available dataset (23), the overall transcript levels and methylation status of SALL4 were  
131 analysed using probes covered the entire SALL4 gene locus. A significant negative  
132 correlation between SALL4 expression and methylation was observed in primary tumours at  
133 the Probe 1 (Fig. 1A and 1B) which was only observed in the 5'UTR – exon 1 region. Sites  
134 located either proximal or distal (Probe 2) to the 5'UTR-exon 1 locus showed poor to no  
135 correlation with SALL4 expression (Fig. 1C).

136 As the methylome and transcriptome of cell lines could be different from those of primary  
137 tumours, we further investigated the negative correlation between SALL4 methylation and  
138 expression among HCC cell lines. The 5'UTR-exon 1-intron 1 region was first inspected and  
139 found to have over 30 CpG dinucleotides (Supplementary S1). Bisulfite sequencing in the

140 HCC cell lines SNU398 and SNU387 revealed distinct and unique methylation profiles for  
141 the two cell lines (Fig. 1D). Within the profiled region, SNU387 showed a near universal,  
142 methylated profile in stark contrast to SNU398 which showed a completely demethylated  
143 profile, with the exception of 4 CpG dinucleotides. The result was consistent with previous  
144 reports observing that methylation of the SALL4 5'UTR-exon 1-intron 1 region is  
145 differentially methylated in K562-induced pluripotency reprogrammed cells and HBV-related  
146 HCC patients. (13,14). To investigate the relationship between the observed methylation  
147 profiles and gene expression, we examined SALL4 expression in both SNU398 and SNU387  
148 (Fig. 1E and 1F). The level of SALL4 transcription was substantive as more than 100 copies  
149 of SALL4 mRNAs per cell were detected in SNU398, while SNU387 cells only expressed  
150 about 10 copies per cell. It was also evident that SALL4 was expressed at much higher  
151 magnitude in SNU398, in which the SALL4 loci was hypomethylated. Taken together, both  
152 the cell line and patient data suggest that SALL4 methylation and expression are negatively  
153 correlated. We therefore confirmed that DNA methylation could be a potential regulatory  
154 mechanism for SALL4 expression in HCC.

155

#### 156 **CRISPR-DiR demethylates and activates SALL4**

157 To further investigate the correlation between methylation of the SALL4  
158 5' UTR- exon 1- intron 1 region and SALL4 expression, the CRISPR-DNMT1-interacting  
159 RNA (CRISPR-DiR) technique was utilized to induce locus-specific demethylation by  
160 blocking DNMT1 activity in SNU387 cells. Briefly, the single guide RNA (sgRNA) was  
161 constructed to contain a SALL4 exon 1 targeting sequence, two RNA loops of ecCEBP $\alpha$  with  
162 validated DNMT1 inhibitory function (15), and the dCAs9-interacting domain (Fig. 2A).  
163 Numerous sgRNAs targeting the SALL4 5' UTR- exon 1- intron 1 locus were designed, with  
164 the four most efficient candidates shortlisted (sgSALL4\_1 - sgSALL4\_4) via *in vitro* sgRNA

165 selection (Supplementary Fig. S2A). Transduced cells were also validated to express the  
166 dCas9-mCherry through FACS (Supplementary Fig. S2B).

167 Methylation of the SALL4 5' UTR- exon 1- intron 1 CpG island was monitored in  
168 SNU387 cells with four independent CRISPR-DiR inductions, one for each shortlisted  
169 sgRNA. Of these inductions, sgSALL4\_1 was the most potent sgRNA tested. Upon  
170 transduction of SNU387 cells with sgSALL4\_1, significant demethylation changes were  
171 observed after 14 days, which continued for over 7 additional days (Fig. 2B). Conversely, no  
172 change in methylation was observed in non-targeting, negative control transduced cells. To  
173 examine potential off-target effects of CRISPR-DiR, we concurrently monitored methylation  
174 of a region in SALL4 exon 4, and confirmed demethylation was localized to only the targeted  
175 5' UTR - exon 1 - intron 1 CpG island (Supplementary Fig. S2C).

176 Following CRISPR-DiR targeted demethylation of the SALL4 5' UTR-exon 1-intron 1  
177 CpG island, both SALL4 transcript and protein levels increased as predicted (Fig. 2C and  
178 2D). The magnitude of SALL4 upregulation observed in these cells was comparable to that of  
179 treatment with 5-aza-2'-deoxycytidine, a global demethylating agent. Furthermore, SALL4  
180 expression was not significantly altered when the cells were transduced with other less  
181 efficient sgRNAs (Supplementary Fig. S2D). As SALL4 overexpression promotes cancer cell  
182 growth, we performed growth assays on sgSALL4-transduced SNU387 cells and observed  
183 increased anchorage-independent and -dependent growth compared to negative control (Fig.  
184 2E and F), suggesting that targeted demethylation of the SALL4 locus leads to upregulated  
185 expression of SALL4, with concomitant enhanced cellular growth.

186

187 **SALL4P5 demethylates and activates SALL4, and associates with DNMT1**



188        There are 8 SALL4 pseudogenes, and since none are located on the same chromosome as  
189 SALL4, it is unlikely that they will be transcribed as siRNAs or antisense transcripts to  
190 deregulate SALL4. However, the identified pseudogenes do share high sequence homology  
191 with the paralogous coding SALL4 gene. It is therefore possible that the SALL4 pseudogenes  
192 could bind to other proteins with either matching DNA/RNA motifs or with comparable  
193 secondary and tertiary structures owing to their high sequence homology. As previously  
194 reported, ecCEBP $\alpha$ , a ncRNA that overlaps with and thus has regions of identity with its  
195 paralog, CEBP $\alpha$ , can interact with DNMT1 and affect CEBP $\alpha$  gene expression. We therefore  
196 postulated that SALL4 pseudogenes, which are highly homologous to SALL4, could  
197 potentially mediate SALL4 demethylation.

198        Each SALL4 pseudogene was transiently overexpressed in SNU387 cells, and the  
199 methylation profile of the 5' UTR-exon 1-intron 1 CpG island was assessed (Fig. 3A). Only  
200 SALL4 pseudogene 5 (SALL4P5) overexpression resulted in a demethylation pattern  
201 comparable to that seen using CRISPR-DiR. Consistently, SALL4P5 knock-down in  
202 hypomethylated SNU398 cells led to increased methylation of the locus as predicted (Fig.  
203 3B).

204        Additional evidence to suggest direct SALL4P5-DNMT1 interaction can be seen by their  
205 matched cellular localization. Cellular localization of pseudogene transcripts is a critical  
206 factor in determining their function, as they must be localized in the same cellular  
207 compartment as their binding partners to exert specific biological functions. It is known that  
208 DNMT1 facilitates methylation exclusively in the nucleus. Critically, SALL4P5 is also  
209 primarily localized to the nucleus. This contrasts with SALL4P7, which has a predominant  
210 cytoplasmic localization in SNU398 (Fig. 3C). Therefore, although SALL4P7 shares  
211 sequence homology with SALL4P5 and SALL4, its primary localization in cytoplasm could,  
212 in part, account for its inability to demethylate the SALL4 locus.

213 As DNMT1 is known as a maintenance DNA methylator, we therefore investigated  
214 whether our observed SALL4P5 demethylation phenotype is due to a SALL4P5-DNMT1  
215 interaction. As there are no known interacting SALL4P5-DNMT1 binding regions or pockets,  
216 we performed an unbiased biotinylated pull-down assay using full-length SALL4P5. First, to  
217 validate the efficacy of the pull-down, DNMT1 protein could successfully pull-down  
218 ecCEPB $\alpha$  (Fig. 3D). Similarly, SALL4P5 was able to successfully pull-down DNMT1,  
219 whereas SALL4P7 and the antisense negative control did not.

220 Having shown an association between SALL4 exon 1 - intron 1 demethylation and SALL4  
221 expression up-regulation, we next investigated the effect of transiently overexpressing  
222 SALL4P5 on SALL4 levels. SALL4P5 overexpression significantly upregulated SALL4  
223 transcript (Fig. 3E) and protein levels, the latter of which was more striking and equivalent to  
224 the overexpression of SALL4 itself (Fig. 3F). Interestingly, SALL4P7 overexpression also  
225 increased SALL4 protein levels. Although SALL4P7 may not play a role in SALL4  
226 demethylation, it could still contribute to gene regulation as homologous pseudogenes could  
227 also function as ceRNAs (21) by sequestering bioavailable microRNAs that target and repress  
228 SALL4. Consistent with the phenotype of elevated SALL4 levels, SALL4P5 overexpression  
229 also significantly increased colony formation of SNU387 cells (Fig. 3G). The data suggest  
230 that SALL4P5 could have oncogenic effects as it can directly upregulate SALL4 expression  
231 and cell growth.

232

### 233 **SALL4P5 is upregulated in HCC patients and during hepatitis B induction**

234 The aforementioned results demonstrate that SALL4P5 upregulation can reactivate SALL4  
235 expression in cell lines. We next sought to validate these findings in primary patient samples,  
236 and measured SALL4P5 expression in HCC patients, who frequently have elevated levels of  
237 SALL4 (10). Twenty HCC patients with paired non-disease samples were screened from a

238 Hong Kong cohort. Among these 20 patients, 19 of them were HBV positive and 7 had  
239 increased SALL4 levels of over 1.5-fold (Fig. 4A). Interestingly, within these 7 patients, only  
240 SALL4P5 expression was concomitantly upregulated, while SALL4P7 showed little to no  
241 change. For patients, such as patient #1, with no SALL4 level change, SALL4P5 expression  
242 was also unaltered.

243 HBV infection is the single most common risk factor of HCC, as more than 50% of  
244 patients contract hepatitis B prior to HCC (24). We therefore sought to investigate whether  
245 SALL4P5-mediated demethylation and subsequent reactivation of SALL4 during hepatitis B  
246 infection could drive oncogenesis. The HepAD38B model was used, as it allows controlled  
247 induction of hepatitis B virus production using the tet-off system (13). Using digital droplet  
248 PCR (ddPCR), we validated that the HepAD38B cells produced the major hepatitis B viral  
249 transcripts such as core, surface, hepatitis B antigen X (HBx) and polymerase transcripts  
250 (Supplementary Fig. 3A). Upon hepatitis B induction, SALL4 and SALL4P5 transcript levels  
251 also increased (Fig. 4B, Supplementary Fig. S3B and S3C). Interestingly, the expression  
252 level for HBx increased first, SALL4P5 expression then followed at 54 hours, and lastly  
253 SALL4 expression at 84 hours in step-wise manner. When performing bisulfite sequencing of  
254 these critical time points, it was found that the average methylation across the CpG island in  
255 the 5'UTR - exon 1 – intron 1 junction decreased upon hepatitis B induction, suggesting that  
256 the infection-induced upregulation of SALL4P5 demethylates and reactivates SALL4. (Fig.  
257 4C).

258

## 259 **Discussion**

260 In this study, we provided a mechanistic link between HBV infection, activation of the  
261 oncogene SALL4, and HCC development. We, for the first time to our knowledge, showed  
262 that hepatitis B viral infection could lead to pseudogene upregulation, which in turn could

263 epigenetically regulate oncogenes and drive tumorigenesis. We also demonstrated for the first  
264 time that a pseudogene can associate with a DNA methyltransferase to inhibit its function and  
265 subsequently influence expression of its coding paralog, oncogenic SALL4. We described a  
266 strong negative correlation between SALL4 expression and exon 1-locus specific methylation  
267 in HCC patients as well as in cell lines. By utilizing a novel CRISPR-DiR technology, we  
268 validated the importance of exon 1 methylation to SALL4 expression and cell growth.  
269 Interfering with DNMT1 activity at a specific CpG island in this region resulted in the  
270 upregulation of SALL4. Furthermore, we identified and characterized SALL4 pseudogene 5  
271 (SALL4P5), which shares high sequence homology with its paralogous coding gene SALL4,  
272 as a critical regulator of SALL4 expression and function by interacting with DNMT1 to  
273 demethylate and upregulate SALL4 expression. More importantly, we demonstrated that  
274 SALL4P5 and SALL4 expression are sequentially upregulated in an HBV induction model as  
275 well as positively correlated and upregulated in hepatitis B-infected HCC patients.

276 This work highlights the previously undescribed capability of a pseudogene to  
277 epigenetically regulate an oncogene by interacting with DNMT1 and affecting its methylation  
278 in a specific region. It is reported that there are at least 12,000 pseudogenes (25) in the human  
279 genome. A recent pan-cancer analysis of pseudogene expression in different cancers  
280 demonstrated that pseudogene expression alone can serve as a molecular and prognostic  
281 factor for patients with different cancer subtypes, highlighting the functional and clinical  
282 importance of pseudogenes (22). There may be other pseudogenes capable of mediating  
283 similar DNMT1-interactions and exerting the demethylating function on oncogenes and  
284 tumor-suppressors in different cancers. Monitoring expression levels of oncogene-  
285 demethylating pseudogenes could enable predicting oncogene activation as well as disease  
286 progression to improve patient outcomes.

287 Understanding the mechanism of pseudogene-mediated demethylation may provide  
288 insights into SALL4 re-expression in HCC, which is of therapeutic value owing to SALL4's  
289 prognostic significance for the disease (7). Here we elaborate how a pseudogene could play a  
290 crucial role in epigenetic regulation of an important oncogene, thereby suggesting that there  
291 could similarly significant and impactful pseudogenes potentially contributing to early-stage  
292 gene regulation of tumor-suppressors and oncogenes. In addition, pseudogenes could exert  
293 non-canonical functions by interacting with other RNA-binding proteins, with potential wide-  
294 ranging implications in gene regulation and function as we have demonstrated here.

295 Previous studies from Di Ruscio et al., demonstrated that RNAs require distinct secondary  
296 structures in order to associate with DNMT1 (15). This preferential interaction through  
297 structure could potentially explain why DNMT1 interacts with SALL4P5, but not SALL4P7,  
298 even though the two pseudogenes are highly homologous. Another striking aspect of  
299 SALL4P5-SALL4 regulation is that unlike ecCEBP $\alpha$ , which resides in the CEBP $\alpha$  locus, the  
300 SALL4P5 locus is on chromosome 3, while its paralogous coding gene SALL4 is on  
301 chromosome 20. This *trans* regulation implies that it could be the sequence homology and  
302 perhaps secondary structure that plays a more critical role than chromosomal location for a  
303 ncRNA to work as a DNMT1-interacting RNA. Moreover, as DNMT1 plays a crucial role in  
304 *de novo* methylation, the SALL4P5-DNMT1 interaction could contribute to SALL4  
305 reactivation as well as other oncogene activation in cancers.

306 DNA hypermethylation of CpG islands in gene promoter regions has consistently  
307 correlated with inactivation of tumor suppressors in cancers (26). Conversely, demethylation  
308 of oncogene promoters leads to increased gene expression (27). Interestingly, it was the  
309 methylation profile of the 5'UTR - Exon 1-Intron 1 region of SALL4 that was critical in  
310 SALL4 upregulation leading to cell growth. Further investigation will be needed to determine

311 whether this non-canonical methylation site, downstream from the promoter, is only  
312 significantly affected in the context of pseudogene-mediated demethylation.

313 These studies represent one of the first examples of gene locus specific demethylation  
314 resulting in the activation of an oncogene. By an innovative strategy, we have identified the  
315 specific CpG island in the locus that is required for SALL4 activation and expression. This  
316 approach could be extended to other loci to identify the CpG “regulating” modules allowing  
317 gene expression and controlled by an RNA-mediated mechanism.

318 Our studies suggest a model in which hepatitis B viral infection upregulates SALL4P5,  
319 followed by SALL4 (Fig. 4D). This novel insight addresses unmet clinical need in HCC as  
320 HCC is one of the leading causes of cancer-related deaths globally and chronic hepatitis B  
321 virus infection accounts for more than 50% of HCC cases (1,28). Elucidating molecular  
322 mechanisms of oncogene activation during hepatitis B virus infection could enhance our  
323 understanding of the pathogenesis of HCC, and hence, aid in development of robust  
324 therapies. Increased SALL4P5 expression is observed in HBV-related HCC patients, making  
325 this pseudogene and its related function in oncogene SALL4 activation relevant to developing  
326 novel therapeutics in HBV-related HCC.

327

## 328 **Methods**

### 329 **Cell Culture**

330 All HCC cell lines were obtained from ATCC and grown according to the manufacturer’s  
331 instructions in the absence of antibiotics. Human hepatocellular carcinoma cell lines  
332 (SNU398, SNU387 and HepAD38B) were maintained in Dulbecco's Modified Eagle's  
333 medium (DMEM) and Roswell Park Memorial Institute 1640 medium (RPMI) (Life  
334 Technologies, Carlsbad, CA) with 10% fetal bovine serum (FBS) (Invitrogen) and 2 mM L-

335 Glutamine (Invitrogen). These cell lines were cultured at 37°C in a humidified incubator with  
336 5% CO<sub>2</sub>. SNU398 was derived in 1990 from a 42-year-old, Asian male hepatocellular  
337 carcinoma patient. SNU387 was derived in 1990 from a 41-year-old, Asian female  
338 hepatocellular carcinoma patient. HepAD38B cell line was derived from a 15-year-old, male  
339 hepatoblastoma patient.

340

#### 341 **RNA extraction and gene expression analysis**

342 Total RNA was extracted from cells using the Trizol® reagent (Invitrogen) and purified  
343 using the RNeasy Mini kit from Qiagen. 1 µg of purified RNA was used for cDNA synthesis  
344 using the High-Capacity cDNA Reverse Transcription Kit (ThermoFisher Scientific)  
345 according to the manufacturer's instructions. The QuantStudio 5 Real-Time PCR System  
346 (Thermo Fisher Scientific) was used to assess the expression levels of the mRNAs, miRNAs,  
347 and pseudogenes of interest. GoTaq® qPCR Master Mix (Promega) was used as a SYBR  
348 master mix reagent for the qPCR procedures. The qRT-PCR data was analyzed using the  
349 QuantStudio™ Design & Analysis Software Version 1.2 (ThermoFisher Scientific) and  
350 represented as relative expression( $\Delta\Delta C_t$ ), normalized against either GAPDH or  $\beta$ -actin. The  
351 primer sequences used for the quantitative real-time PCR are provided in Supplementary  
352 Table 1.

353

#### 354 **Genomic DNA extraction**

355 Genomic DNA was extracted from HCC cell cultures using DNeasy Blood & Tissue  
356 kit(Qiagen) for bisulfite-sequencing assay according to the manufacturer's protocols.

357

#### 358 **Bisulfite treatment and sequencing**

359 SALL4 5'UTR Exon 1 3'UTR region methylation status was assessed using bisulfite  
360 sequencing. In brief, 1 µg of genomic DNA extracted using the DNeasy Blood & Tissue  
361 kit(Qiagen) was bisulfite-converted by using the EZ DNA Methylation kit (Zymo Research).  
362 PCR products were gel-purified (Qiagen) from the 1.5% TAE gel and cloned into the pGEM-  
363 T Easy Vector System (Promega) for transformation. The cloned vectors were transformed  
364 into ECOS 101 DH5α cells and miniprep was performed to extract plasmids. Sequencing  
365 results were analysed using BiQ analyser software. Samples with more than 90% conversion  
366 rate and 70% sequences identity were analysed. The minimum number of clones for each  
367 sequenced condition was 6. Primers used for the bisulfite sequencing of SALL4  
368 5' UTR - exon 1 - intron 1 are listed in Supplementary Table 2.

369

#### 370 **Protein extraction and immunoblotting**

371 Total cell lysates in protein lysis buffer (PLB) (100mM KCl (Ambion), 5mM MgCl<sub>2</sub>  
372 (Ambion), 25mM EDTA pH 8.0 (Life Technologies), 10mM HEPES (Life Technologies),  
373 0.5% NP-40 (Roche), 20mM DTT(Fermentas), Proteinase inhibitor tablet (Roche)). PLB was  
374 added to the cell pellets and incubated for 15 minutes on ice. The lysates were centrifuged for  
375 10 minutes at 15,000 x g at 4 °C. Protein concentrations were measured using the Bradford  
376 Protein Assay (Bio-Rad Laboratories) and absorbance was measured at 595 nm on the Tecan  
377 Infinite® 2000 PRO plate reader (Tecan, Seestrasse, Switzerland). Equal amounts of protein  
378 for each sample were diluted with 4X sample buffer (ThermoFisher Scientific) and heated at  
379 95 °C for 5 minutes. The proteins were resolved by SDS-PAGE 12% self-cast gel and  
380 transferred onto polyvinylidene difluoride (PVDF) membrane using the Mini Trans-Blot®  
381 Electrophoretic Transfer Cell (Bio-Rad) in transfer buffer (25 mM Tris, 192 mM Glycine,  
382 and 20% (v/v) methanol (Fischer Chemical)]. After blocking with 5% milk in Tris-NaCl  
383 buffer (TBS) (ThermoFisher Scientific) with 0.1% Tween-20 (Sinopharm Chemical Reagent  
384 Co., Ltd) (TBST), membranes were incubated with the appropriate primary and secondary



385 antibodies. The immune-reactive proteins were detected using the protein bands were  
386 visualized using SuperSignal™ West Dura Extended Duration Substrate (ThermoFisher  
387 Scientific) and visualized on Image Quant LAS 500 machine (GE Healthcare) according to  
388 the manufacturer's instructions. SALL4 (Santa Cruz Biotechnology, EE30, #sc-101147),  
389 GAPDH (Cell Signaling Technology, #5174), and DNMT1 (Abcam, #ab87656) antibodies  
390 were used for immunoblotting as per manufacturer's instructions.

391

### 392 **Bacterial transformation**

393 ECOSTM 101 competent cells(DH5α) from Yeastern Biotech Co., Ltd. were used for  
394 transformation following the manufacturer's instructions. 50μl of cells were thawed at room  
395 temperature in a water bath. 2μl of pre-chilled DNA was immediately added. The tubes were  
396 kept on ice for 5 minutes to increase the transformation efficiency. The cells went through  
397 heat shock in a 42°C water bath for 30 seconds. The cells were kept on ice again for 5  
398 minutes and plated on LB plates. The plates were incubated at 37°C for 16 hours.

399

### 400 **Plasmid extraction**

401 Plasmid was extracted from 1.5 ml of bacterial culture with the QIAamp DNA Mini  
402 Kit(Qiagen) and purified for sequencing validation (1st BASE). For transfected cell line  
403 DNA extraction, plasmid was extracted from the cell pellet that is suspended in 100 μl of  
404 PBS.

405

### 406 **Plasmid transfection**

407 SNU398 cells were seeded at a density of 75,000 cells/well in 12-well plates 24 hours  
408 before transfection. SNU387 and SNU182 cells were seeded at higher density of 100,000  
409 cells/well in 12-well plates. 500 ng of plasmid was added to 3 μl of P3000 reagent (Life

410 Technologies) in 75  $\mu$ l of Opti-MEM prior to mixing with 2  $\mu$ l of Lipofectamine 3000 (Life  
411 Technologies). The reagent mixture was incubated at room temperature for 10 minutes before  
412 adding to each well.

413

#### 414 **Cell viability assay**

415 24 hours post-transfection, cells were trypsinized and split into 5 individual wells of 5  
416 separate 12-well plates. Upon adherence, cells were fixed using 10% neutral buffered  
417 formalin solution (Sigma-Aldrich, HT501128-4L) and labelled as day 0. Subsequently, the  
418 remaining plates were fixed daily from day 2 to day 5 (excluding day 1) prior to staining with  
419 crystal violet (Sigma-Aldrich, C0775-100G) for 3-5 minutes at room temperature. Stained  
420 wells were washed three times with Milli-Q water and left to dry. Crystal violet stain was  
421 solubilized using 10% acetic acid (Sigma-Aldrich, A6283-2.5L). The plates were left on a  
422 shaker at room temperature for at least 20 minutes. The absorbance reading for each well was  
423 measured at 595 nm using the Tecan Infinite® 2000 PRO plate reader (Tecan, Seestrasse,  
424 Switzerland).

425

#### 426 **Soft agar assay**

427 A 0.6% agarose base was prepared by mixing 3.9 ml of 2% Ultrapure agarose (Invitrogen)  
428 with 9.1 ml of cell culture medium. 2 ml of the mixture was added to individual wells of 6-  
429 well plates. 24 hours post-transfection, cells were trypsinized, counted, and diluted to a  
430 concentration of 15,000 cells/well. 450  $\mu$ l of the 2% agarose was added to 2.55 ml of cells for  
431 a final agarose concentration of 0.3%, and 1 ml of the mixture was added to each well  
432 containing the solidified 0.6% agarose base. 1 ml of culture media was added to the top agar  
433 layer upon solidification and the cells were incubated at 37 °C in a humidified incubator.

434 Culture medium was changed every two days. Images of the colonies were taken under 4X  
435 magnification every 4-5 days for a period of up to 14 days and quantified using ImageJ.

436

#### 437 ***In vitro* transcription (IVT) and biotinylated RNA pulldown**

438 The DNA template was first amplified by PCR with primers containing a 5' T7-tag for in  
439 vitro transcription. Antisense SALL4P5 control was also amplified by having the reverse  
440 primers carrying the T7-tag. The IVT was performed as per manufacturer's guidelines. 1 µg  
441 of purified PCR product was incubated with the transcription mix which was composed of  
442 10X transcription buffer, 400 mM NTP mix, and 200 U T7 RNA polymerase for 5 hours at  
443 37 °C. 140 µl of RNase-free water and 1000 µl of 100% ethanol were added to the  
444 transcription product and incubated for at least 30 minutes at -20 °C. The reaction mixture  
445 was centrifuged for 1 hour at 4 °C to precipitate the RNA. The RNA pellet was collected and  
446 dissolved in 100 µl of ultra-pure water. The RNA was further purified using RNeasy Mini  
447 250 columns (Qiagen) according to the manufacturer's instructions. The purified RNA  
448 obtained from IVT was labelled with biotin at the 3' end using the Pierce™ RNA 3'End  
449 Desthiobiotinylation Kit (ThermoFisher Scientific) according to the manufacturer's protocol.  
450 Biotin labelling efficiency of the RNA probes was determined using the Chemiluminescent  
451 Nucleic Acid Detection Module Kit (ThermoFisher Scientific) following the manufacturer's  
452 protocol. Biotin labelling efficiency was normalized against the efficiency of antisense  
453 transcript to determine amount of initial RNA bait used for the subsequent pulldown  
454 experiment. Pulldown using these labelled RNA probes was carried out using the Pierce™  
455 Magnetic RNA-Protein Pull-Down Kit (ThermoFisher Scientific) according to the  
456 manufacturer's instructions. Protein lysates eluted from the pulldowns were used for  
457 immunoblotting and other downstream analysis. The primer sequences with the T7-tag for  
458 the PCR are provided in Supplementary Table 3.

459

460 ***In vitro* generation of sgRNA transcripts**

461 Approximately 1.4kb of genomic fragment spanning SALL4 5' UTR - exon 1 - intron 1  
462 was PCR amplified (Zymo Research) and cloned into the pGEM-T Easy vector. The vector  
463 was linearized with BamH1 restriction enzyme (New England Biolabs). SALL4-targeting  
464 sgRNA candidates were transcribed with HiScribe™ Quick T7 High Yield RNA Synthesis  
465 Kit (New England Biolabs) following manufacturer's instructions. The sgRNA target  
466 sequences within SALL4 locus can be supplied upon request

467

468 ***In vitro* cleavage and selection of sgRNA transcripts**

469 *In vitro* cleavage assay was performed using purified Cas9 nuclease from *S. pyogenes*  
470 (New England Biolabs) in order to select SALL4-specific sgRNA among candidates. The  
471 experiment was performed according to the manufacture's protocol. The sgRNAs were  
472 denatured at 95°C for 3 minutes, then Cas9 protein and sgRNAs were incubated for 10  
473 minutes at 25°C to form a complex. Lastly, a linearized SALL4 DNA fragment was added to  
474 the mixture and the entire reaction was incubated at 37°C for 1 hour. The reaction mixture  
475 was composed of purified Cas9 protein, individual sgRNA, and linearized SALL4 genomic  
476 fragment in ratio of 10: 10: 1. 1 ul of Proteinase K was added to each sample after the  
477 cleavage reaction, and it was then incubated at room temperature for 10 minutes. The result  
478 was analyzed with a 1% agarose gel.

479

480 **Lentiviral transduction of sgSALL4\_1 and dCas9**

481 Lentiviruses expressing dCas9 or sgRNA were packaged in 293T cells the plasmids  
482 psPAX2 and pMD2.G. TransIT-LT1 Transfection Reagent (Mirus) was used for transfection  
483 into 293T cells. Virus was collected at 48 hours and 72 hours post-transfection. The collected

484 virus was filtered through 0.45  $\mu\text{m}$  microfilters and stored at  $-80\text{ }^{\circ}\text{C}$ . Transduction of SNU-  
485 387 cells was performed by mixing virus and 4  $\mu\text{g}/\text{mL}$  polybrene (Santa Cruz) together to  
486 add to the cells seeded in T75 flasks 24 hours prior to the transduction. 24 hours after the  
487 transduction, the medium was replenished with normal RPMI culture medium. Transduction  
488 efficiency was determined by GFP (for sgRNA) or mCherry (dCas9) expression by FACS  
489 analysis, and the positive cells were sorted by a FACS Aria machine (BD Biosciences).

490

#### 491 **5-aza-2'-deoxycytidine(decitabine) treatment**

492 SNU387 cells were treated with 1.25  $\mu\text{M}$  of 5-aza-2'-deoxycytidine (Sigma-Aldrich)  
493 according to the manufacturer's instructions. Culture medium and drug were refreshed every  
494 24 hours due to the drug being light-sensitive. RNA (for RT-PCR) and genomic DNA (for  
495 bisulphite sequencing) were isolated after 5 days of treatment

496

#### 497 **Digital droplet PCR**

498 Reactions for the ddPCR were prepared by harvesting 100,000 cells on each day for RNA  
499 extraction and cDNA preparation. The reaction mixture was prepared with the 2x ddPCR  
500 supermix for probes (Biorad, Cat #186-3026), 10-fold diluted cDNA, nuclease-free water,  
501 and forward and reverse primers. Once the reaction mixture was ready, it was loaded into a  
502 DG8 cartridge for the QX200 Automated Droplet Generator (Biorad, Cat#186-4003). We  
503 then proceeded to the thermal cycling with a Biorad C1000 Touch Thermal Cycler with the  
504 following cycle conditions:  $95^{\circ}\text{C}$  for 10minutes,  $94^{\circ}\text{C}$  for 30 seconds (40 cycles),  $60^{\circ}\text{C}$  for 2  
505 minutes (40 cycles),  $98^{\circ}\text{C}$  for 10 minutes and  $4^{\circ}\text{C}$  hold. The reaction plate was loaded into  
506 the QX200 Droplet Reader (Biorad, Cat#186-4003) for gene expression analysis.

507

#### 508 **SALL4 methylation and expression correlation analysis**

509 Pearson correlations between SALL4 expression and methylation levels were performed  
510 for the sites within the 5' UTR - exon 1 - intron 1 intron 1 region and distant sites in the  
511 intron 1 (Fig S2). In order to show that a negative correlation is specific to primary HBV+  
512 HCC patients, adjacent normal samples were used as negative controls. The data used for the  
513 correlation was taken from Yang, et al (15), containing 19 pairs of primary HBV+ HCC  
514 patients and their matched adjacent normal tissues.

515

### 516 **Materials Availability**

517 All plasmids and mouse lines generated in this study are freely available from the authors  
518 upon reasonable request.

519

### 520 **Data and Code Availability**

521 The data used for the correlation was taken from Yang, et al, 2017 containing 19 pairs of  
522 primary HBV+ HCC patients and their matched adjacent normal tissues. The authors declare  
523 that all other data supporting the findings of this study are available within the paper and its  
524 supplementary information files.

525

### 526 **References**

- 527 1. Yang JD, Roberts LR. Epidemiology and management of hepatocellular carcinoma. *Infect Dis*  
528 *Clin North Am* **2010**;24(4):899-919, viii doi S0891-5520(10)00059-00.1016/j.idc.2010.07.004.
- 529 2. Keating GM, Santoro A. Sorafenib: a review of its use in advanced hepatocellular carcinoma.  
530 *Drugs* **2009**;69(2):223-40 doi 10.2165/00003495-200969020-000066.
- 531 3. Yang J, Chai L, Fowles TC, Alipio Z, Xu D, Fink LM, *et al.* Genome-wide analysis reveals Sall4 to  
532 be a major regulator of pluripotency in murine-embryonic stem cells. *Proc Natl Acad Sci U S*  
533 *A* **2008**;105(50):19756-61 doi 10.1073/pnas.0809321105.
- 534 4. Zhang J, Tam WL, Tong GQ, Wu Q, Chan HY, Soh BS, *et al.* Sall4 modulates embryonic stem  
535 cell pluripotency and early embryonic development by the transcriptional regulation of  
536 Pou5f1. *Nat Cell Biol* **2006**;8(10):1114-23 doi 10.1038/ncb1481.
- 537 5. Ma Y, Cui W, Yang J, Qu J, Di C, Amin HM, *et al.* SALL4, a novel oncogene, is constitutively  
538 expressed in human acute myeloid leukemia (AML) and induces AML in transgenic mice.  
539 *Blood* **2006**;108(8):2726-35 doi 10.1182/blood-2006-02-001594.

- 540 6. Yue X, Xiao L, Yang Y, Liu W, Zhang K, Shi G, *et al.* High cytoplasmic expression of SALL4  
541 predicts a malignant phenotype and poor prognosis of breast invasive ductal carcinoma.  
542 *Neoplasma* **2015**;62(6):980-8 doi 10.4149/neo\_2015\_119.
- 543 7. Kobayashi D, Kuribayashi K, Tanaka M, Watanabe N. Overexpression of SALL4 in lung cancer  
544 and its importance in cell proliferation. *Oncol Rep* **2011**;26(4):965-70 doi  
545 10.3892/or.2011.1374.
- 546 8. Oikawa T, Kamiya A, Zeniya M, Chikada H, Hyuck AD, Yamazaki Y, *et al.* Sal-like protein 4  
547 (SALL4), a stem cell biomarker in liver cancers. *Hepatology* **2013**;57(4):1469-83 doi  
548 10.1002/hep.26159.
- 549 9. Yang J, Chai L, Gao C, Fowles TC, Alipio Z, Dang H, *et al.* SALL4 is a key regulator of survival  
550 and apoptosis in human leukemic cells. *Blood* **2008**;112(3):805-13 doi 10.1182/blood-2007-  
551 11-126326.
- 552 10. Yong KJ, Gao C, Lim JS, Yan B, Yang H, Dimitrov T, *et al.* Oncofetal gene SALL4 in aggressive  
553 hepatocellular carcinoma. *N Engl J Med* **2013**;368(24):2266-76 doi  
554 10.1056/NEJMoa1300297.
- 555 11. Li A, Jiao Y, Yong KJ, Wang F, Gao C, Yan B, *et al.* SALL4 is a new target in endometrial cancer.  
556 *Oncogene* **2015**;34(1):63-72 doi 10.1038/onc.2013.529.
- 557 12. Liu BH, Jobichen C, Chia CSB, Chan THM, Tang JP, Chung TXY, *et al.* Targeting cancer  
558 addiction for SALL4 by shifting its transcriptome with a pharmacologic peptide. *Proc Natl*  
559 *Acad Sci U S A* **2018**;115(30):E7119-E28 doi 10.1073/pnas.1801253115.
- 560 13. Fan H, Cui Z, Zhang H, Mani SK, Diab A, Lefrancois L, *et al.* DNA demethylation induces SALL4  
561 gene re-expression in subgroups of hepatocellular carcinoma associated with Hepatitis B or  
562 C virus infection. *Oncogene* **2017**;36(17):2435-45 doi 10.1038/onc.2016.399.
- 563 14. Amabile G, Di Ruscio A, Muller F, Welner RS, Yang H, Ebralidze AK, *et al.* Dissecting the role  
564 of aberrant DNA methylation in human leukaemia. *Nat Commun* **2015**;6:7091 doi  
565 10.1038/ncomms8091.
- 566 15. Di Ruscio A, Ebralidze AK, Benoukraf T, Amabile G, Goff LA, Terragni J, *et al.* DNMT1-  
567 interacting RNAs block gene-specific DNA methylation. *Nature* **2013**;503(7476):371-6 doi  
568 10.1038/nature12598.
- 569 16. Chalei V, Sansom SN, Kong L, Lee S, Montiel JF, Vance KW, *et al.* The long non-coding RNA  
570 Dali is an epigenetic regulator of neural differentiation. *Elife* **2014**;3:e04530 doi  
571 10.7554/eLife.04530.
- 572 17. Wang L, Zhao Y, Bao X, Zhu X, Kwok YK, Sun K, *et al.* LncRNA Dum interacts with Dnmts to  
573 regulate Dppa2 expression during myogenic differentiation and muscle regeneration. *Cell*  
574 *Res* **2015**;25(3):335-50 doi 10.1038/cr.2015.21.
- 575 18. Merry CR, Forrest ME, Sabers JN, Beard L, Gao XH, Hatzoglou M, *et al.* DNMT1-associated  
576 long non-coding RNAs regulate global gene expression and DNA methylation in colon cancer.  
577 *Hum Mol Genet* **2015**;24(21):6240-53 doi 10.1093/hmg/ddv343.
- 578 19. Hawkins PG, Morris KV. Transcriptional regulation of Oct4 by a long non-coding RNA  
579 antisense to Oct4-pseudogene 5. *Transcription* **2010**;1(3):165-75 doi  
580 10.4161/trns.1.3.13332.
- 581 20. Watanabe T, Totoki Y, Toyoda A, Kaneda M, Kuramochi-Miyagawa S, Obata Y, *et al.*  
582 Endogenous siRNAs from naturally formed dsRNAs regulate transcripts in mouse oocytes.  
583 *Nature* **2008**;453(7194):539-43 doi 10.1038/nature06908.
- 584 21. Poliseno L, Salmena L, Zhang J, Carver B, Haveman WJ, Pandolfi PP. A coding-independent  
585 function of gene and pseudogene mRNAs regulates tumour biology. *Nature*  
586 **2010**;465(7301):1033-8 doi 10.1038/nature09144.
- 587 22. Han L, Yuan Y, Zheng S, Yang Y, Li J, Edgerton ME, *et al.* The Pan-Cancer analysis of  
588 pseudogene expression reveals biologically and clinically relevant tumour subtypes. *Nat*  
589 *Commun* **2014**;5:3963 doi 10.1038/ncomms4963.



- 590 23. Yang Y, Chen L, Gu J, Zhang H, Yuan J, Lian Q, *et al.* Recurrently deregulated lncRNAs in  
591 hepatocellular carcinoma. *Nat Commun* **2017**;8:14421 doi 10.1038/ncomms14421.  
592 24. Di Bisceglie AM. Hepatitis B and hepatocellular carcinoma. *Hepatology* **2009**;49(5  
593 Suppl):S56-60 doi 10.1002/hep.22962.  
594 25. Torrents D, Suyama M, Zdobnov E, Bork P. A genome-wide survey of human pseudogenes.  
595 *Genome Res* **2003**;13(12):2559-67 doi 10.1101/gr.1455503.  
596 26. Esteller M. Cancer epigenomics: DNA methylomes and histone-modification maps. *Nat Rev*  
597 *Genet* **2007**;8(4):286-98 doi 10.1038/nrg2005.  
598 27. Huhtanen CN, Feinberg JI, Trenchard H, Phillips JG. Acid Enhancement of Clostridium  
599 botulinum Inhibition in Ham and Bacon Prepared with Potassium Sorbate and Sorbic Acid. *J*  
600 *Food Prot* **1983**;46(9):807-10 doi 10.4315/0362-028X-46.9.807.  
601 28. Ganem D, Prince AM. Hepatitis B virus infection--natural history and clinical consequences.  
602 *N Engl J Med* **2004**;350(11):1118-29 doi 10.1056/NEJMra031087.

603

#### 604 **Author contributions**

605 D.G.T., L.C., and Y.T. initiated the project and provided guidance throughout. D.G.T.,  
606 L.C., Y.T., C.G., and J.K. designed the experiments. J.K. carried out experiments, analyzed  
607 data, prepared figures, and wrote the manuscript. C.G, Y.L, and A.J carried out experiments,  
608 prepared figures and edited the manuscript. M.A.B. analyzed the data, prepared figures, and  
609 edited the manuscript. H.Y. and L.Y. performed the bioinformatics analysis on SALL4  
610 expression and methylation. A.D.R. and J.Y. reviewed the manuscript. D.G.T, L.C, and Y.T  
611 conceived of and supervised the project, designed experiments, and critically reviewed the  
612 manuscript.

613

#### 614 **Acknowledgements**

615 We thank Sudhakar Jha and Polly Chen for their insightful suggestions. We also thank the  
616 Tenen, Tay, and Chai lab members for reviewing the manuscript. D.G.T. is funded by the  
617 Singapore Ministry of Health's National Medical Research Council under its Singapore  
618 Translational Research (STaR) Investigator Award, as well as NIH grants 1R35CA197697  
619 and P01HL131477. Y.T. is funded by a Singapore National Research Foundation Fellowship  
620 and National University of Singapore President's Assistant Professorship. This research is  
621 supported by the National Research Foundation Singapore and the Singapore Ministry of



622 Education under its Research Centres of Excellence initiative, as well as the RNA Biology  
623 Center at the Cancer Science Institute of Singapore, NUS, as part of funding under the  
624 Singapore Ministry of Education's AcRF Tier 3 grants, Grant number MOE2014-T3-1-006.  
625 L.C. is funded by NIH/NHLBI grant P01HL095489. A.D.R. is funded by NCI  
626 R00CA188595, the Italian Association for Cancer Research (AIRC) start up grant #2014-  
627 15347, and the Giovanni Armenise-Harvard Foundation.

628

## 629 **Figure Legends**

630 **Figure 1: SALL4 expression is negatively correlated with methylation of the**  
631 **5'UTR-exon 1-intron 1 region. (A)** Schematic representation of the methylation probes. The  
632 numbers refer to each CpG dinucleotide. The probe in the 5'UTR-exon 1 junction, "Probe 1",  
633 assesses the methylation status of the CpG dinucleotide #11 and the intronic probe, "Probe 2"  
634 assesses the CpG dinucleotide #68 in Supplementary Figure 1. **(B and C)** SALL4 expression  
635 and methylation correlation analysis in 19 HBV+ patients. Compared to paired adjacent non-  
636 transformed liver tissue, there is a negative correlation between SALL4 expression and  
637 Probe 1 methylation, which is not observed using Probe 2. **(D)** Bisulfite sequence of the  
638 5'UTR-exon 1 intron 1 region in wildtype SNU398 and SNU387 HCC cell lines. White color  
639 represents hypomethylation while black represents hypermethylation of the individual CpG  
640 dinucleotide. Degree of methylation was determined as a proportion of methylated cytosine  
641 residue at a position out of 10 clones. Only CpG dinucleotides 1 to 35 are represented as the  
642 sequencing efficiency was poor for dinucleotides 36 to 39. **(E)** Absolute quantification of  
643 SALL4 mRNA expression in wildtype SNU398 and SNU387.  $\beta$ -actin was used as a positive  
644 control for the assay. cDNA for  $\beta$ -actin quantification was diluted 10 times and back-  
645 calculated accordingly later. The levels of  $\beta$ -actin were comparable between SNU398 and  
646 SNU387 at about 400 to 600 copies of transcripts per cell. However, SNU398 cells expressed

647 more than 150 copies of SALL4 mRNAs while SNU387 expressed less than 10 copies on  
648 average. (F) SALL4 protein levels in wildtype SNU398 and SNU387.  $\beta$ -actin was used as a  
649 loading control for immunoblotting.

650

651 **Figure 2. CRISPR-DiR demethylates and activates SALL4.** (A) single-guide RNA design  
652 for the CRISPR-DiR. The red region targets and interacts with the SALL4 5'UTR. The black  
653 region interacts with dCas9. The blue regions are the two segments of ecCEBP $\alpha$  that interact  
654 with DNMT1 (15). (B) Bisulfite sequence of CRISPR-DiR transduced SNU387 cells. The  
655 data represents the methylation profile 14 days after CRISPR-DiR for SALL4. The numbers  
656 indicate each of the CpG dinucleotides in the 5'UTR-exon 1 intron 1 junction. The white  
657 color represents hypomethylation while the black hypermethylation of the individual CpG  
658 dinucleotides. Only CpG dinucleotides 1 to 35 are represented as the sequencing efficiency  
659 was poor for dinucleotides 36 to 39. (C & D) SALL4 transcript and protein levels after  
660 CRISPR-DiR in SNU387. The western blot image is cropped as there were multiple lanes in  
661 between "D21" and "5-aza". However, they are from the same blot and exposed for the same  
662 duration. (E) Soft agar growth assay for CRISPR-DiR in SNU387. (F) Growth curve assay  
663 for CRISPR-DiR for SALL4 in SNU387. 5-aza-2-deoxycytidine(decitabine) was used as a  
664 positive control. NT denotes non-targeting negative control. Mean  $\pm$  SD,  $n \geq 3$ , \*P < 0.05;  
665 \*\*P < 0.01; \*\*\*P < 0.001.

666

667 **Figure 3. SALL4P5 demethylates and activates SALL4, and associates with DNMT1.**

668 (A) Bisulfite sequencing after transient overexpression of individual SALL4 pseudogenes in  
669 SNU387. The methylation status of CpG dinucleotides in SALL4 5'UTR-exon 1 intron is  
670 shown. (B) Bisulfite sequencing after SALL4P5 knockdown in SNU398. ShScr denotes  
671 scrambled shRNA. shSALL4P7 was used as a negative control. (C) Transcript localization in

672 SNU398. Cells were fractionated into nuclear and cytoplasmic fractions and transcript  
673 expression was quantified.  $\beta$ -tubulin was used as a cytoplasmic fraction control, 18S rRNA  
674 as the nuclear fraction control. **(D)** Biotin-labelled pull-down of DNMT1 in SNU398. Full  
675 length SALL4P5 was used as a bait to pull down complexes and DNMT1 presence was  
676 probed using immunoblotting. “as P5” denotes the negative control, antisense-SALL4P5 and  
677 “ecCEBP $\alpha$ ” denotes the positive control. Full length SALL4P7 was used as a pseudogene  
678 negative control as well. **(E and F)** SALL4 transcript and protein expression after pseudogene  
679 overexpression in SNU387. **(G)** Soft agar growth assay for pseudogene overexpression in  
680 SNU387. Mean  $\pm$  SD,  $n \geq 3$ , \* $P < 0.05$ ; \*\* $P < 0.01$ ; \*\*\* $P < 0.001$ .

681

682 **Figure 4. SALL4P5 is upregulated in HCC patients and during hepatitis B induction.**

683 **(A)** Relative SALL4 transcript expression in paired HCC patient samples. All expression  
684 data are normalized against adjacent non-transformed tissues. Patient #1 was used as a  
685 negative control with unaltered SALL4 and SALL4P5 levels. The levels of SALL4,  
686 SALL4P5, and SALL4P7 were assessed for the other six patients, patients #2 to 7, as they  
687 had more than 1.5-fold elevation in SALL4 levels compared to adjacent non-transformed  
688 tissues. **(B)** Absolute quantification (RNA copies per cell) of Hepatitis B antigen X, HBx,  
689 and SALL4 transcripts during hepatitis B induction in HepAD38B. Transcript levels of HBx  
690 and SALL4 transcripts were monitored every 6-12 hours post HBV induction **(C)** Average  
691 methylation in SALL4 5'UTR-exon 1 intron 1 across the 35 CpG dinucleotides in  
692 HepAD38B. Blue denotes SALL4 methylation profile without HBV induction, while red  
693 denotes SALL4 methylation profile after induction. Mean  $\pm$  SD,  $n \geq 3$ . \* $P < 0.05$ ; \*\* $P < 0.01$ ;  
694 \*\*\* $P < 0.001$ .

## Figure 1

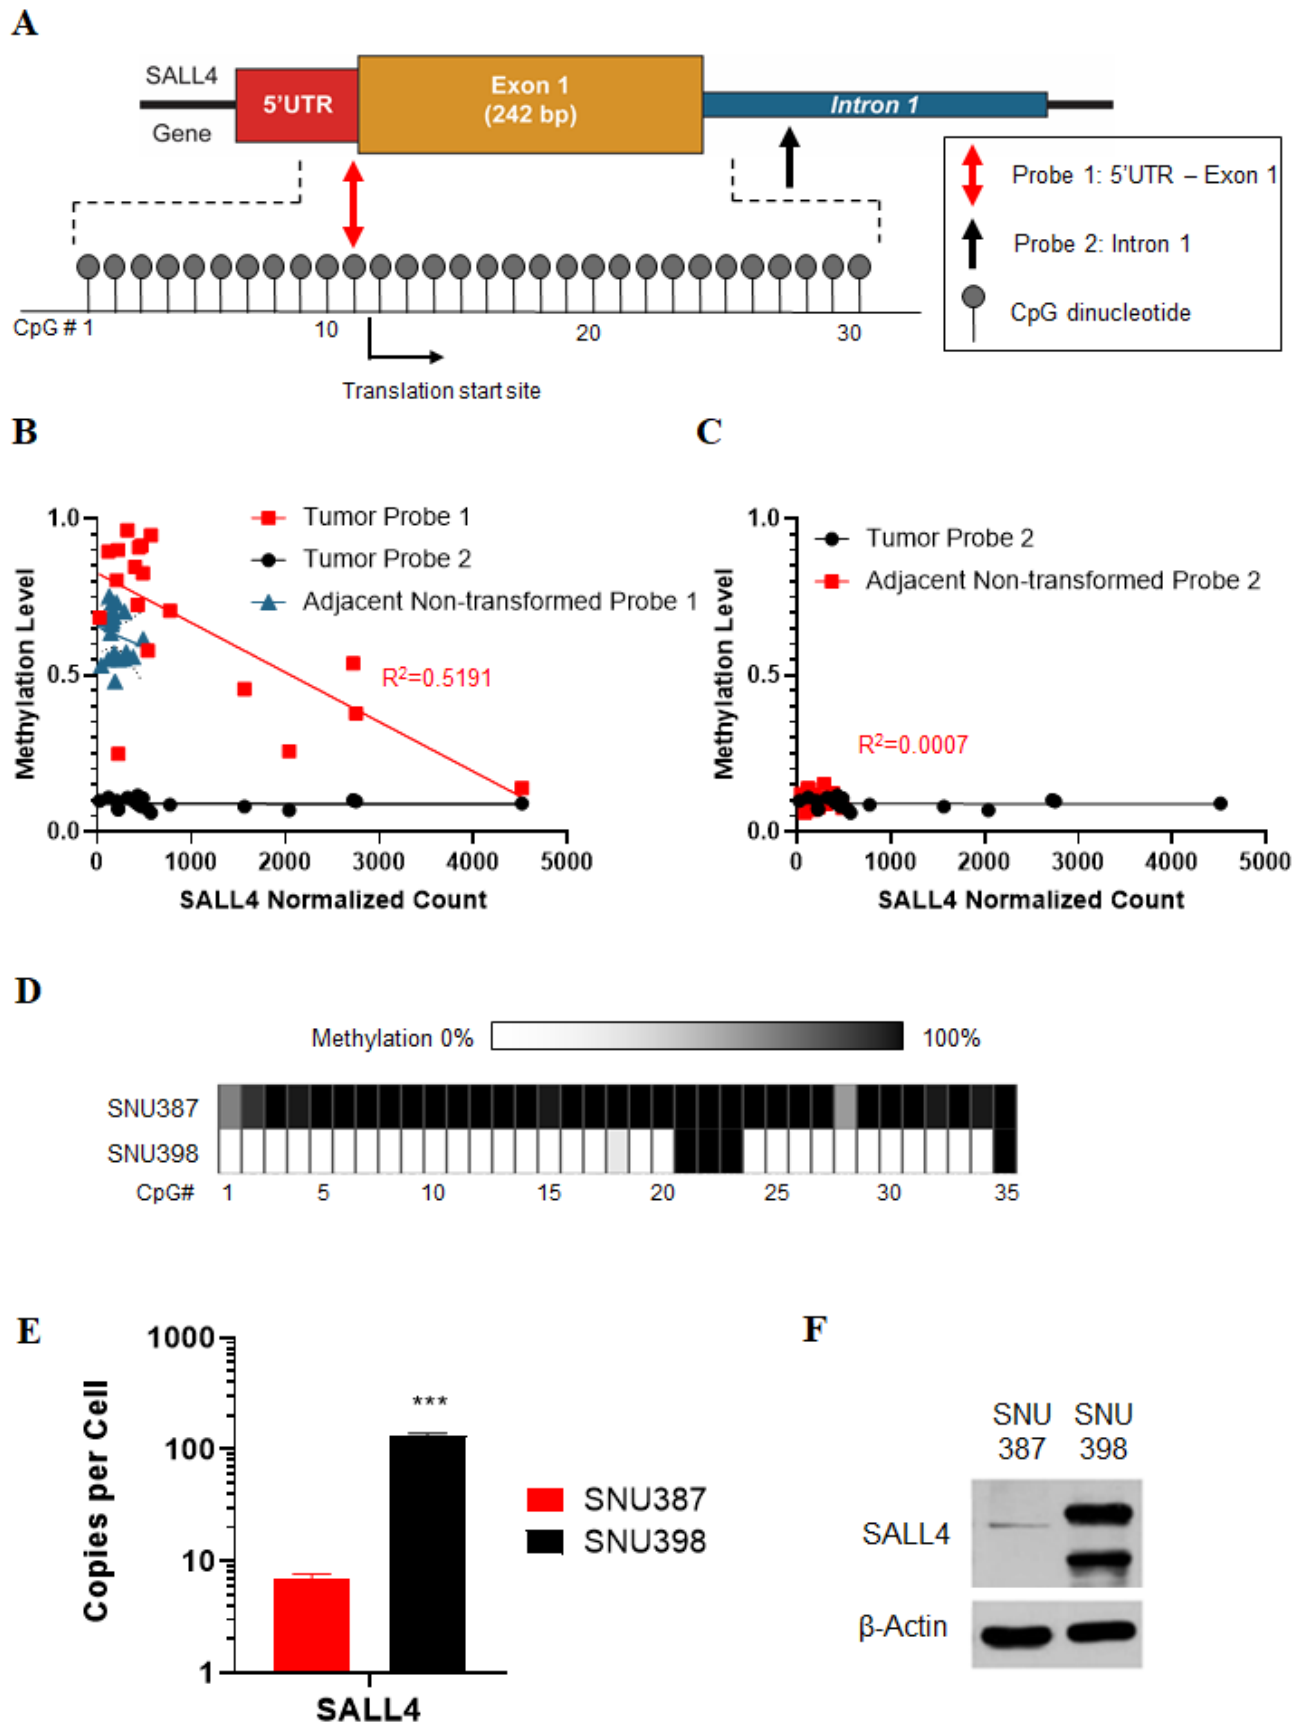

## Figure 2

**A**

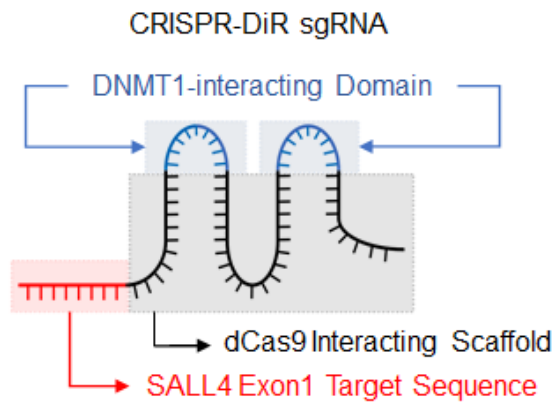

**B**

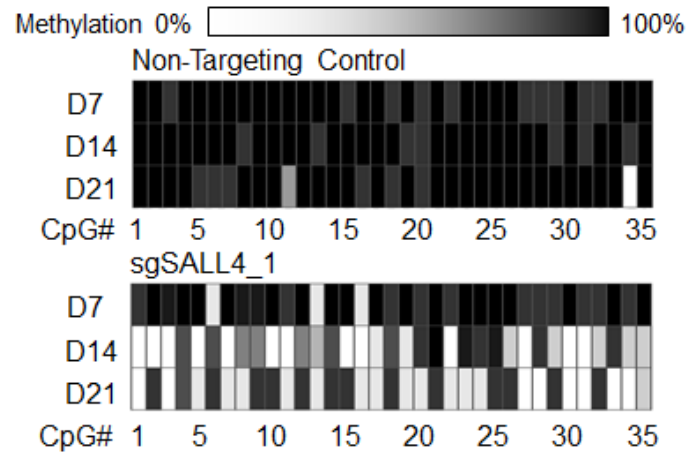

**C**

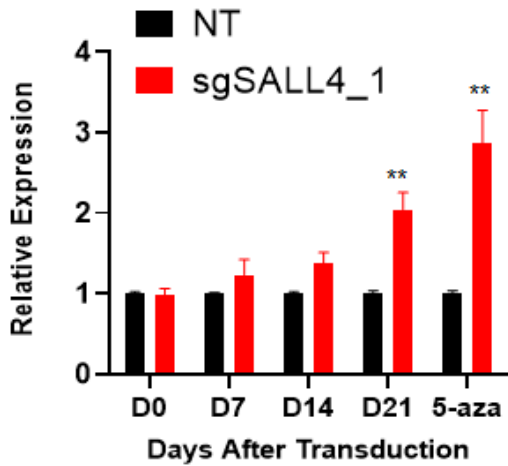

**D**

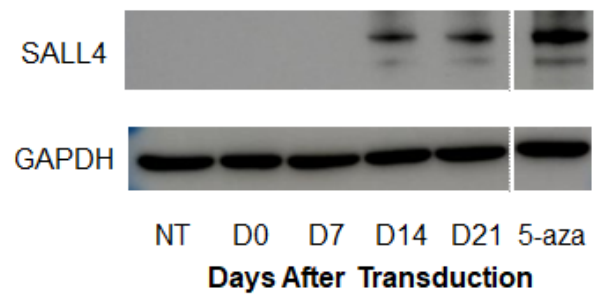

**E**

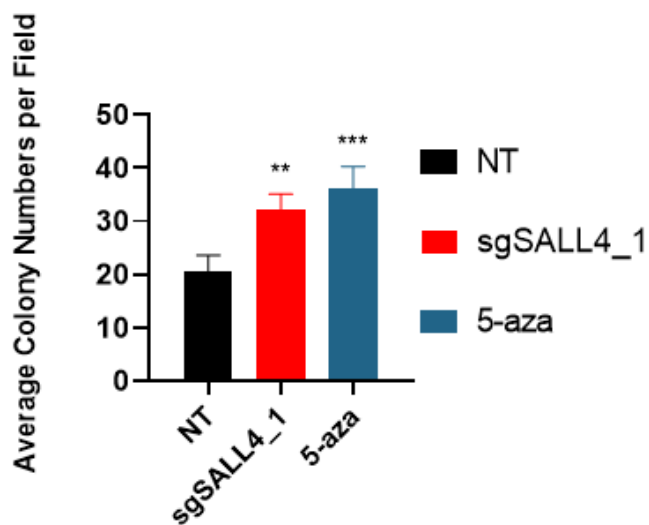

**F**

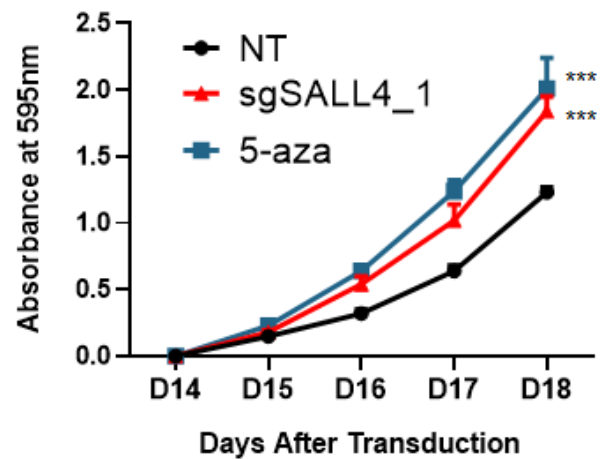

## Figure 3

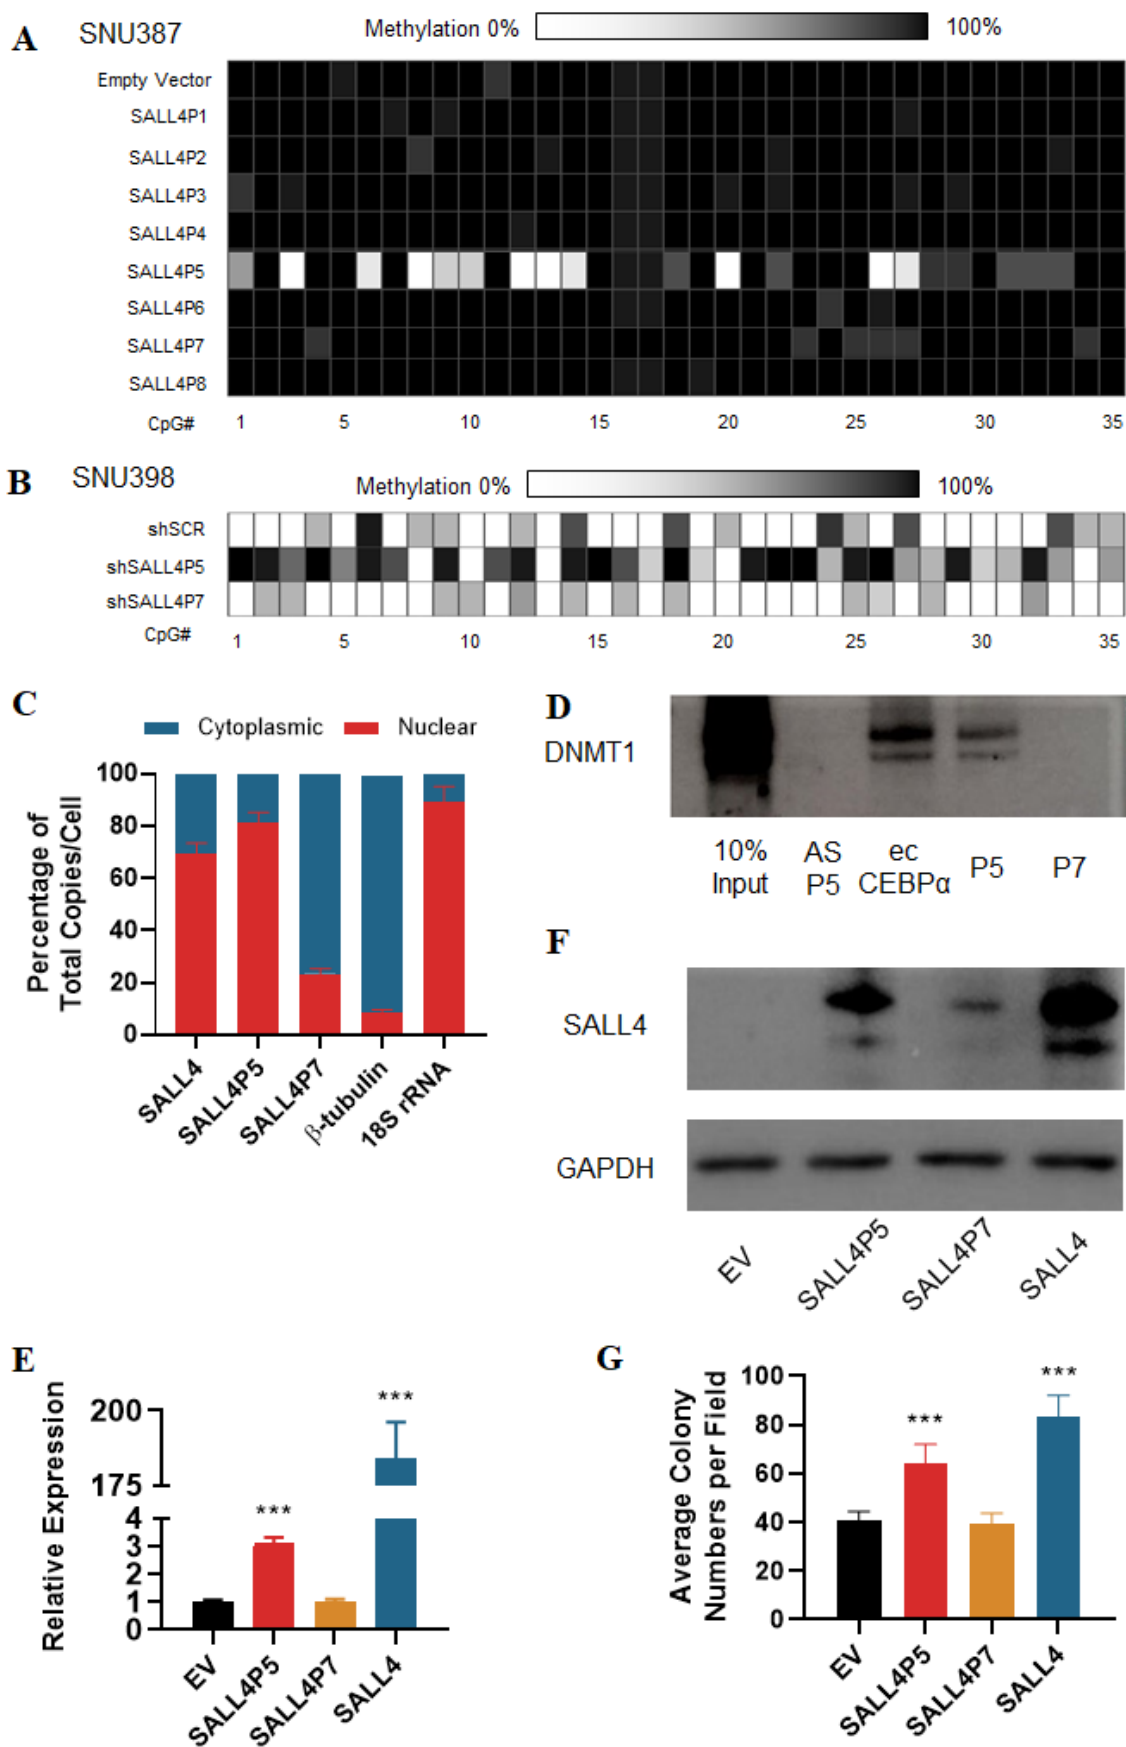

Figure 4

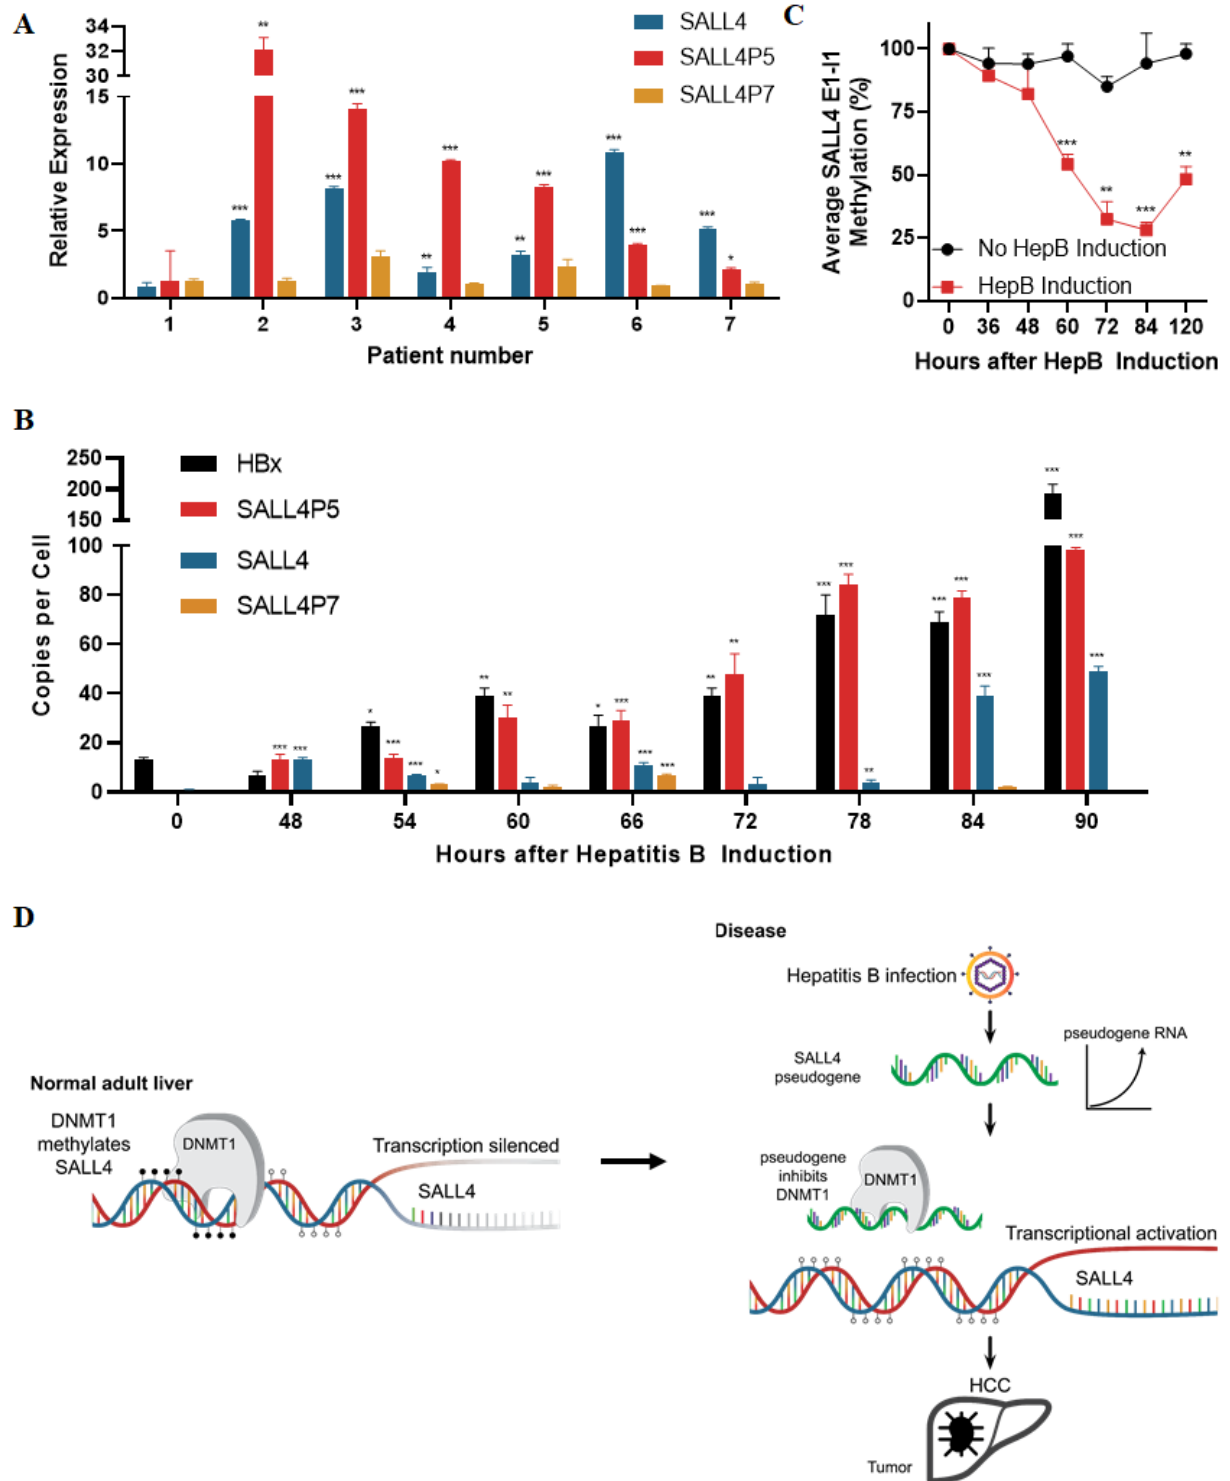

Source: https://www.biorxiv.org/content/10.1101/2020.07.15.205542v1.full.pdf
